# Supplementary material
Source: Springer Nature journal article supplement (https://www.springermedizin.de/resource/supplementary/12936_2013_2926_MOESM1_ESM.pdf/9544634)
Supplement: MOESM1 [file 9544634]

**A**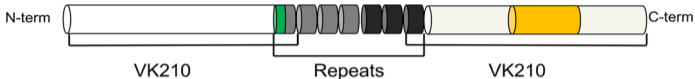**B**

PvCSP210 type repeats: GQPAGDRAD

PvCSP247 type repeats: GANGAGNQP

PvCSP chimera

MGHNVDLSKA INLNGVNFNNVDASSLGAAHVGQSASRGRGLGENPDDEEGDAK KKKDGKKA E

PKNPREN KLKQP GDRAD GQPAGDRAD GQPAGDRAD GQPAGDRAD I GANGAGNQP

GANGAGNQP

GANGAGNQP GNEGANAPNEKSVKEYLDKVRATVGT EWTPCSVTCGVGVRVRRRVNAANKKPE

DLTLNDLETDVCHHHHHH
